# Supplementary material for: Attempts to Understand Oral Mucositis in Head and Neck Cancer Patients through Omics Studies: A Narrative Review
Source: MDPI journal article supplement (doi:10.3390/ijms242316995), 2023-11-30

**Supplementary Table 1.** Search strategy for selection of literature.

Database(s): Ovid MEDLINE(R) ALL 1946 to October 27, 2022

Search Strategy:

| #  | Searches                                                                                                                                                                                                  | Results |
|----|-----------------------------------------------------------------------------------------------------------------------------------------------------------------------------------------------------------|---------|
| 1  | exp Mucositis/                                                                                                                                                                                            | 1887    |
| 2  | exp Stomatitis/                                                                                                                                                                                           | 18189   |
| 3  | (mucositides or mucositis or stomatitides or stomatitis).ti,ab,kf.                                                                                                                                        | 27288   |
| 4  | 1 or 2 or 3                                                                                                                                                                                               | 38889   |
| 5  | exp Genetics/                                                                                                                                                                                             | 306013  |
| 6  | exp Biomarkers/                                                                                                                                                                                           | 862602  |
| 7  | exp Genomics/                                                                                                                                                                                             | 145470  |
| 8  | (Genetic* or genomic* or biomarker* or genome or gene or transcription).ti,kf.                                                                                                                            | 1330928 |
| 9  | ge.fs.                                                                                                                                                                                                    | 3878104 |
| 10 | exp Genetic Predisposition to Disease/                                                                                                                                                                    | 155031  |
| 11 | exp Whole Genome Sequencing/                                                                                                                                                                              | 16404   |
| 12 | exp High-Throughput Nucleotide Sequencing/                                                                                                                                                                | 49827   |
| 13 | exp transcription, genetic/                                                                                                                                                                               | 234621  |
| 14 | exp Gene Expression Profiling/                                                                                                                                                                            | 156072  |
| 15 | exp Gene Expression/                                                                                                                                                                                      | 492942  |
| 16 | exp Genetic Variation/                                                                                                                                                                                    | 1176355 |
| 17 | Single Nucleotide Polymorphism.ti,ab,kf.                                                                                                                                                                  | 35285   |
| 18 | (Proteomics* or proteomics or proteome or transcriptome or epigenomic* or transcriptomic*).ti,ab,kf.                                                                                                      | 204417  |
| 19 | exp Metabolomics/                                                                                                                                                                                         | 25218   |
| 20 | (Metabolomic or Metabolomics or metabolome or metabolit*).ti,ab,kf.                                                                                                                                       | 342518  |
| 21 | exp Microbiota/                                                                                                                                                                                           | 67133   |
| 22 | (microbiomics or microbiome or microbiomes or microbiota or microbiotas or microflora or microorganism* or "micro organism*" or microbiological or microbial or flora or microbes or microbium).ti,ab,kf. | 483503  |

|    |                                                                                                                                                                                                         |         |
|----|---------------------------------------------------------------------------------------------------------------------------------------------------------------------------------------------------------|---------|
| 23 | mi.fs.                                                                                                                                                                                                  | 825251  |
| 24 | exp *MICROBIOLOGY/                                                                                                                                                                                      | 95303   |
| 25 | or/5-24                                                                                                                                                                                                 | 6266612 |
| 26 | 4 and 25                                                                                                                                                                                                | 9161    |
| 27 | exp *Mucositis/ or exp *Stomatitis/                                                                                                                                                                     | 14605   |
| 28 | (stomatitis or mucositis).ti,kf.                                                                                                                                                                        | 10293   |
| 29 | 27 or 28                                                                                                                                                                                                | 19186   |
| 30 | 26 and 29                                                                                                                                                                                               | 4359    |
| 31 | limit 30 to (english language and yr="2003 -Current")                                                                                                                                                   | 2484    |
| 32 | exp Neoplasms/                                                                                                                                                                                          | 3750717 |
| 33 | (cancer* or carcinom* or tumor* or tumour* or neoplas* or malignan* or metasta* or myeloma* or leuk?emia* or lymphoma* or sarcoma* or melanoma* or radiotherapy or radiation or chemotherapy).ti,ab,kf. | 4534839 |
| 34 | 32 or 33                                                                                                                                                                                                | 5270436 |
| 35 | 31 and 34                                                                                                                                                                                               | 766     |
| 36 | case reports.pt. not (exp clinical study/ or comparative study/ or evaluation studies/ or meta-analysis/ or multicenter study/ or validation studies/ or letter.pt.)                                    | 2049846 |
| 37 | case report*.ti,jn.                                                                                                                                                                                     | 333747  |
| 38 | case reports.pt. not (((case adj4 series) or cohort or retrospective*).ti,ab. or exp Cohort Studies/)                                                                                                   | 2171662 |
| 39 | 36 or 37 or 38                                                                                                                                                                                          | 2348630 |
| 40 | 35 not 39                                                                                                                                                                                               | 728     |
| 41 | ((intestinal or gastrointestinal) not oral).ti.                                                                                                                                                         | 197358  |
| 42 | 40 not 41                                                                                                                                                                                               | 592     |
| 43 | (animals not (humans and animals)).sh.                                                                                                                                                                  | 5025007 |
| 44 | (mice or mouse or murine or rat or rats or rodent or cells or "in vitro" or "cell line").ti.                                                                                                            | 2703628 |
| 45 | 43 or 44                                                                                                                                                                                                | 6158589 |
| 46 | 42 and 45                                                                                                                                                                                               | 167     |
| 47 | 42 not 46                                                                                                                                                                                               | 425     |

**Supplementary Figure 1:** Search Strategy and PRISMA Flow Diagram for literature review based on Page et al. [76]. For more information on PRISMA, visit <http://www.prisma-statement.org/>.

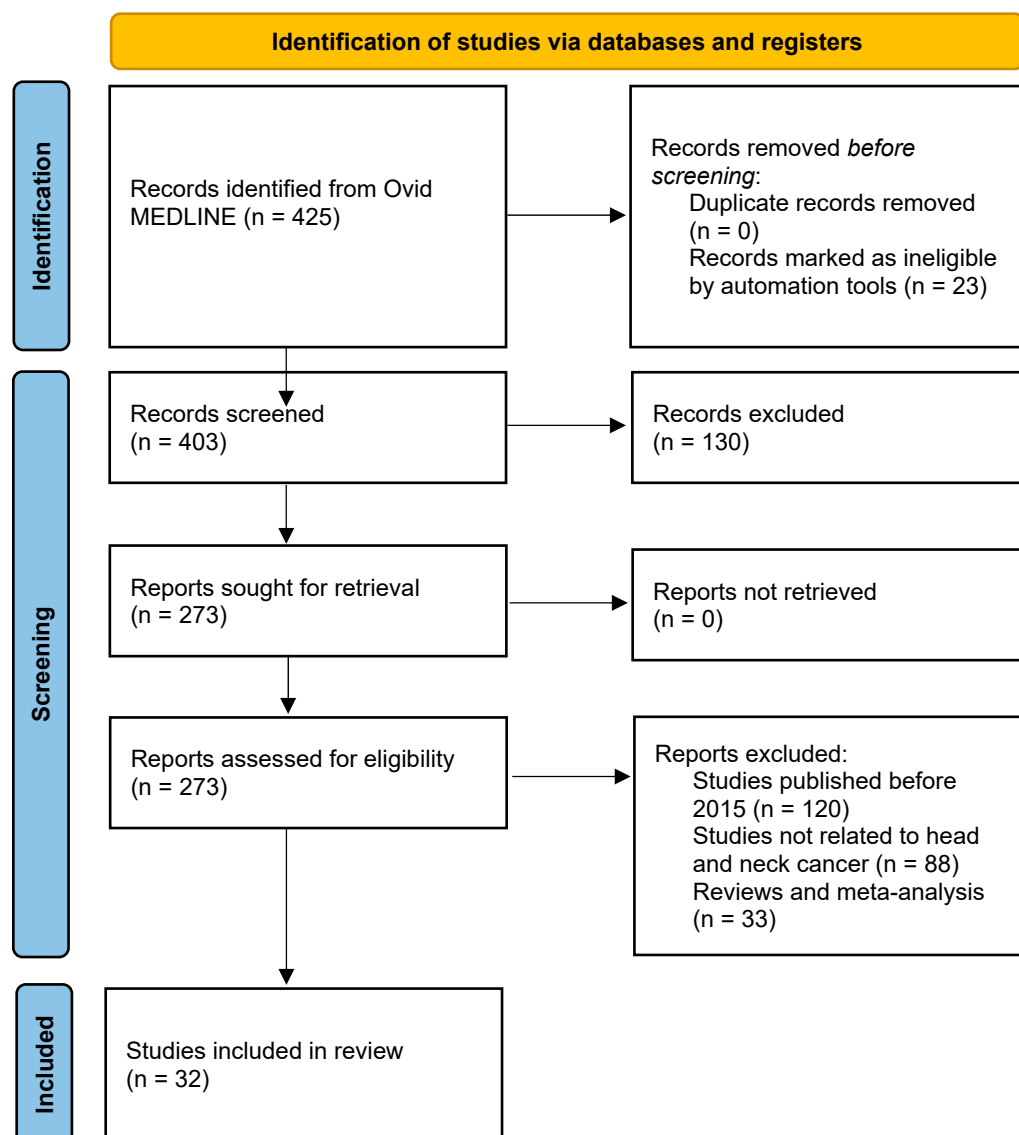

Supplement: s1 [file s1]
